# Supplementary material for: Multi-Year Evaluation of Silage Yield, Quality, and Stability in Maize (Zea mays L.) Genotypes under Black Sea Conditions
Source: Research Square preprint supplement (doi:10.21203/rs.3.rs-8231847/v1), 2025-12-04
Supplement: Supplementary file 1 [file bc952d07bc9ed80d6c475e78.docx]

A total of 1,100 initial materials obtained from various domestic and international sources (populations, F1 hybrids, local landraces, and segregating materials) were subjected to morphological evaluations (tassel characteristics, ear architecture, plant appearance, leaf shape, etc.) and selected accordingly. Through negative selection conducted between 2008 and 2014, 154 inbred lines were advanced to the S6 stage.

In 2014, test crosses were made between 125 of these pure lines and three testers, resulting in 270 hybrid combinations for which sufficient seed was obtained from all three testers. In 2015, the test-cross yield trials were established at two locations. Based on the performance of the lines and their heterotic groupings, 30 inbred lines showing strong combining ability were selected.

Considering traits such as days to flowering and pollen availability, 56 hybrid combinations were produced in 2016. Hybrid combinations lacking adequate seed for yield trials were eliminated from further evaluation.

| **New Hybrid Codes** | **Female** | **X** | **Male** | **New Hybrid Codes** | **Female** | **X** | **Male** | **New Hybrid Codes** | **Female** | **X** | **Male** |
| --- | --- | --- | --- | --- | --- | --- | --- | --- | --- | --- | --- |
| TTM2016-1 | TK531 | X | TK595 | TTM2016-24 | TK683 | X | TK568 | TTM2016-47 | TK462 | X | TK527 |
| TTM2016-2 | TK521 | X | TK595 | TTM2016-25 | TK539 | X | TK568 | TTM2016-48 | TK634 | X | TK527 |
| TTM2016-3 | TK542 | X | TK595 | TTM2016-26 | TK625 | X | TK568 | TTM2016-49 | TK384 | X | TK527 |
| TTM2016-4 | TK534 | X | TK595 | TTM2016-27 | TK541 | X | TK568 | TTM2016-50 | TK586 | X | TK527 |
| TTM2016-5 | TK640 | X | TK595 | TTM2016-28 | TK684 | X | TK568 | TTM2016-51 | TK651 | X | TK527 |
| TTM2016-6 | TK649 | X | TK595 | TTM2016-29 | TK663 | X | TK568 | TTM2016-52 | TK5595 | X | TK527 |
| TTM2016-7 | TK661 | X | TK595 | TTM2016-30 | TK649 | X | TK568 | TTM2016-53 | TK648 | X | TK527 |
| TTM2016-8 | TK456 | X | TK595 | TTM2016-31 | TK384 | X | TK568 | TTM2016-54 | TK672 | X | TK527 |
| TTM2016-9 | TK636 | X | TK595 | TTM2016-32 | TK586 | X | TK568 | TTM2016-55 | TK467 | X | TK527 |
| TTM2016-10 | TK634 | X | TK595 | TTM2016-33 | TK638 | X | TK568 | TTM2016-56 | TK634 | X | TK527 |
| TTM2016-11 | TK568 | X | TK595 | TTM2016-34 | TK679 | X | TK568 |  | | | |
| TTM2016-12 | TK603 | X | TK595 | TTM2016-35 | TK595 | X | TK568 |
| TTM2016-13 | TK647 | X | TK568 | TTM2016-36 | TK673 | X | TK568 |
| TTM2016-14 | TK531 | X | TK568 | TTM2016-37 | TK683 | X | TK568 |
| TTM2016-15 | TK521 | X | TK568 | TTM2016-38 | TK648 | X | TK568 |
| TTM2016-16 | TK527 | X | TK568 | TTM2016-39 | TK609 | X | TK527 |
| TTM2016-17 | TK440 | X | TK568 | TTM2016-40 | TK614 | X | TK527 |
| TTM2016-18 | TK523 | X | TK568 | TTM2016-41 | TK634 | X | TK527 |
| TTM2016-19 | TK616 | X | TK568 | TTM2016-42 | TK568 | X | TK527 |
| TTM2016-20 | TK521 | X | TK568 | TTM2016-43 | TK603 | X | TK527 |
| TTM2016-21 | TK413 | X | TK568 | TTM2016-44 | TK583 | X | TK527 |
| TTM2016-22 | TK542 | X | TK568 | TTM2016-45 | TK459 | X | TK527 |
| TTM2016-23 | TK534 | X | TK568 | TTM2016-46 | TK571 | X | TK527 |
